# Supplementary material for: Are the elderly patient's changes in the health-related quality of life one year after gastrectomy for stomach cancer different from those in young patients?
Source: PubMed Central journal article supplement — Ann Surg Treat Res. 2020 Dec 30;100(1):8–17. doi: 10.4174/astr.2021.100.1.8 (PMC7791192; doi:10.4174/astr.2021.100.1.8), 2020-12-30
Supplement: astr-100-8-s001.pdf [file astr-100-8-s001.pdf]

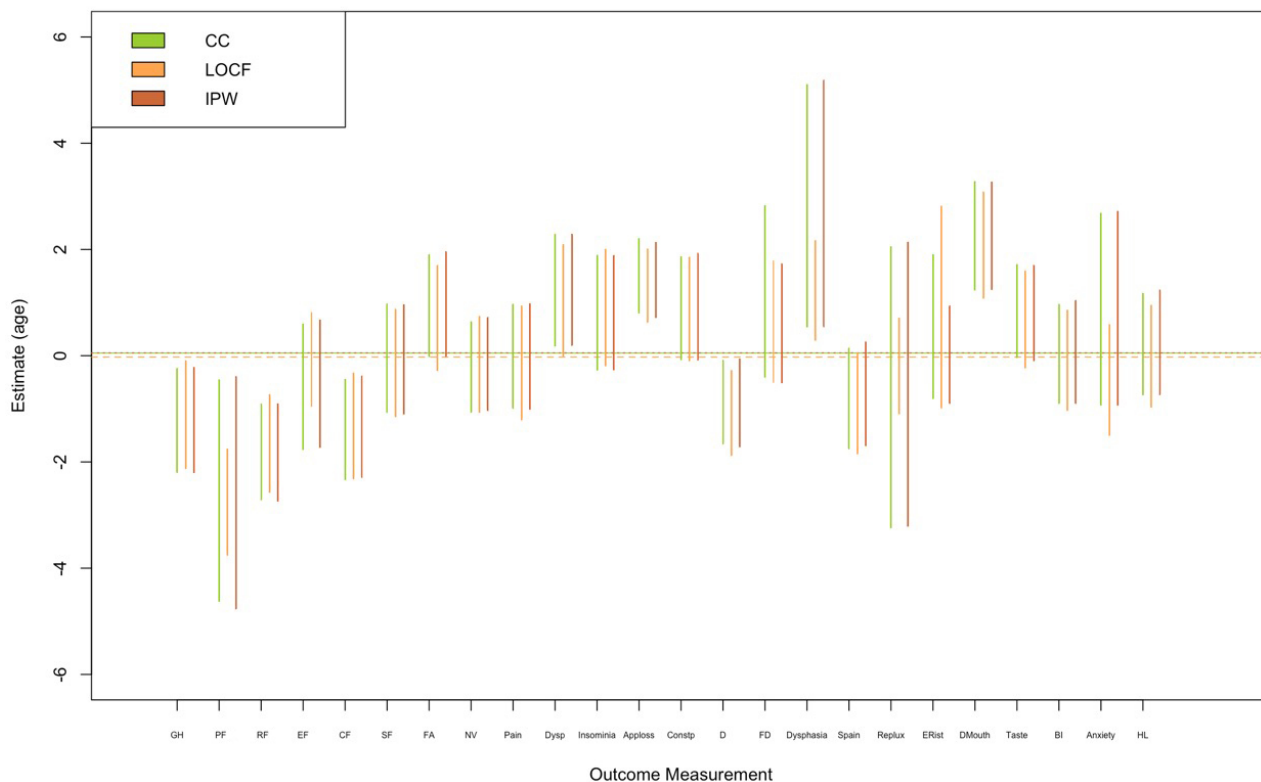

**Supplementary Fig. 1.** Age and 24 quality of life marginal/common associations under the different missing data approaches. The 95% confidence interval of the age effects are displayed. CC, complete data analysis; LOCF, last observations carried forward; IPW, inverse probability weighting. GH, global health status and QOL; PF, physical functioning; RF, role functioning; EF, emotional functioning; CF, cognitive functioning; SF, social functioning; FA, fatigue; NV, nausea and vomiting; Dysp, dyspnea; Apploss, appetite loss; Constp, constipation; D, diarrhea; FD, financial difficulties; Spain, chest and abdominal pain; Replux, reflux symptoms; ERist, eating restriction; DMouth, having a dry mouth; BI, body image; HL, hair loss.
